# Supplementary material for: Relationship between Helicobacter pylori infection and digestive tract diseases and analysis of risk factors: a cross-sectional study based on 3867 Chinese patients
Source: publisher site journal article supplement (doi:10.18632/aging.206065), 2024-08-22
Supplement: Supplementary file [file aging-v16i16-206065-supplementary-material-SD1.pdf]

## SUPPLEMENTARY TABLES

**Supplementary Table 1. *H. pylori* infection status in patients with esophageal squamous cell carcinoma (ESCC) in different locations.**

| Locations                   | <i>H. pylori</i> infection (+)<br>(n = 34) | <i>H. pylori</i> infection (-)<br>(n = 10) | Total<br>(n = 44) | Infection rate | P-value  |
|-----------------------------|--------------------------------------------|--------------------------------------------|-------------------|----------------|----------|
| Cervical Esophageal Cancer  | 5                                          | 3                                          | 8                 | 62.50%         | P > 0.05 |
| Thoracic Esophageal Cancer  | 29                                         | 6                                          | 35                | 82.86%         |          |
| Abdominal Esophageal Cancer | 0                                          | 1                                          | 1                 | 0              |          |

**Supplementary Table 2. *H. pylori* infection status in patients with colorectal cancer in different locations.**

| Locations               | <i>H. pylori</i> infection (+)<br>(n = 75) | <i>H. pylori</i> infection (-)<br>(n = 24) | Total<br>(n = 99) | Infection rate | P-value  |
|-------------------------|--------------------------------------------|--------------------------------------------|-------------------|----------------|----------|
| Ascending Colon Cancer  | 14                                         | 7                                          | 21                | 66.67%         | P > 0.05 |
| Transverse Colon Cancer | 7                                          | 2                                          | 9                 | 77.78%         |          |
| Descending Colon Cancer | 5                                          | 2                                          | 7                 | 71.43%         |          |
| Sigmoid Colon Cancer    | 27                                         | 8                                          | 35                | 77.14%         |          |
| Rectal Cancer           | 22                                         | 5                                          | 27                | 81.48%         |          |
